# Supplementary material for: Label-free optical bio-sensing of non-cancerous and cancerous tissues from mice: distinct spectroscopic features of thiazole orange
Source: Royal Society of Chemistry journal article supplement (doi:10.1039/d2sd00154c), 2022-11-01
Supplement: d2sd00154c1.pdf [file d2sd00154c1.pdf]

## Electronic Supplementary Information

### Label-free Optical Bio-Sensing of Non-cancerous and Cancerous Tissues from Mice: Distinct Spectroscopic Features of Thiazole Orange

Ravisha Gala,<sup>a,†,#</sup> Vishwa V. Gandhi,<sup>a,b,†</sup> Nilotpal Barooah,<sup>a</sup> Amit Kunwar,<sup>\*a,b</sup> Achikanath C. Bhasikuttan,<sup>\*a,b</sup> and Jyotirmayee Mohanty<sup>\*a,b</sup>

<sup>a</sup>Radiation & Photochemistry Division, Bhabha Atomic Research Centre, Mumbai, 400085 INDIA. <sup>b</sup>Homi Bhabha National Institute, Training School Complex, Anushaktinagar, Mumbai, 400094, India. <sup>†</sup> Equal Contribution.

<sup>#</sup> Student of Sunandan Divatia School of Science, NMIMS, Mumbai, India.

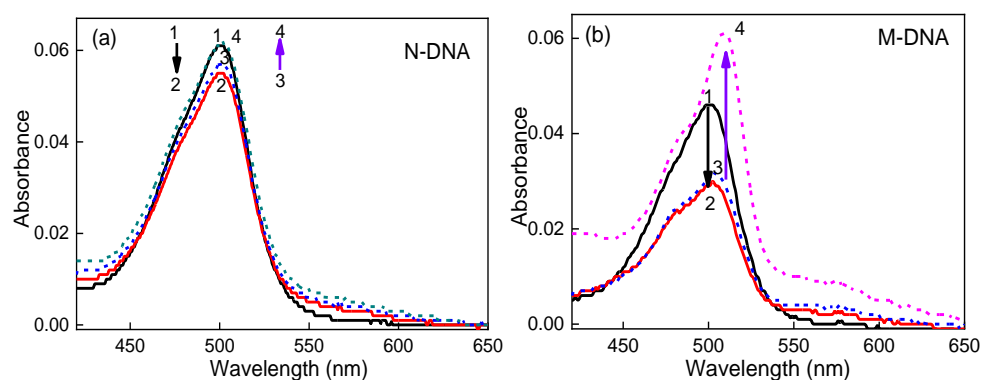

**Fig. S1** Absorption spectra of TO ( $\sim 4 \mu\text{M}$ ) at different concentrations of **(A)** [N-DNA]/ $\mu\text{M}$ : (1) 0, (2) 1, (3) 2 and (4) 6. **(B)** [M-DNA]/ $\mu\text{M}$ : (1) 0, (2) 0.4, (3) 0.8 and (4) 29. The above data set is the representative of the individual mouse of C57BL/6J strain.

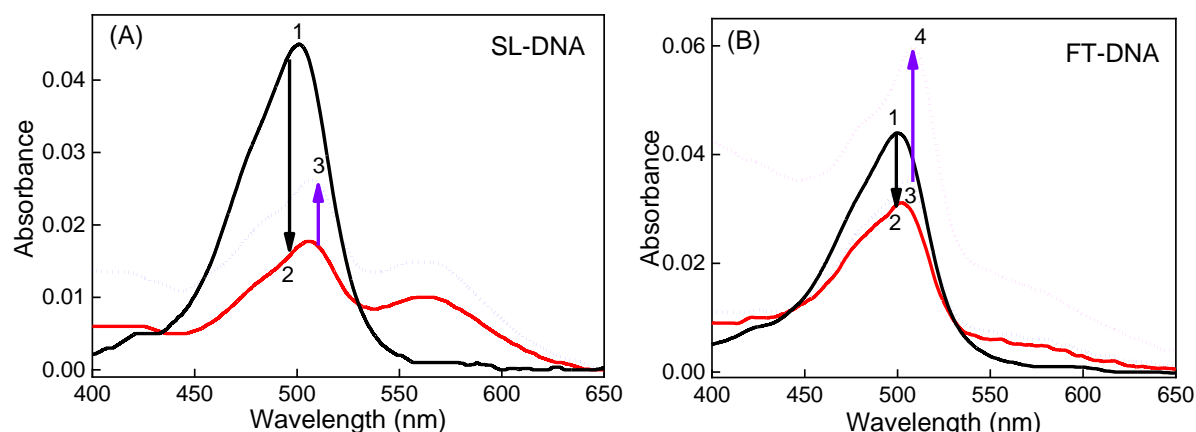

**Fig. S2** Absorption spectra of TO ( $\sim 4 \mu\text{M}$ ) at different concentrations of **(A)** [SL-DNA]/ $\mu\text{M}$ : (1) 0, (2) 1, (3) 6; **(B)** [FT-DNA]/ $\mu\text{M}$ : (1) 0, (2) 0.8, (3) 3, (4) 38; The above data set is the representative of the individual mouse of Swiss albino strain.

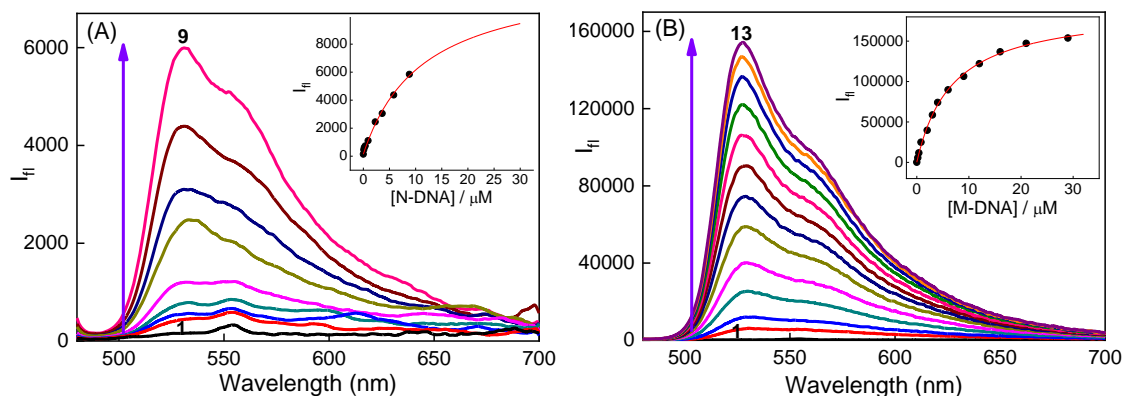

**Fig. S3** Steady-state fluorescence spectra of TO ( $\sim 4 \mu\text{M}$ ) at different concentrations of **(a)** [N-DNA]/ $\mu\text{M}$ : (1) 0, (2) 0.1, (3) 0.2, (4) 0.4, (5) 1, (6) 2, (7) 4, (8) 6, (9) 9. **(b)** [M-DNA]/ $\mu\text{M}$ : (1) 0, (2) 0.2, (3) 0.4, (4) 0.8, (5) 2, (6) 3, (7) 4, (8) 6, (9) 9, (10) 12, (11) 16, (12) 21, (13) 29. **Insets** show the binding isotherm of TO with the respective DNA. The above data set is the representative of the individual mouse of C57BL/6J strain.

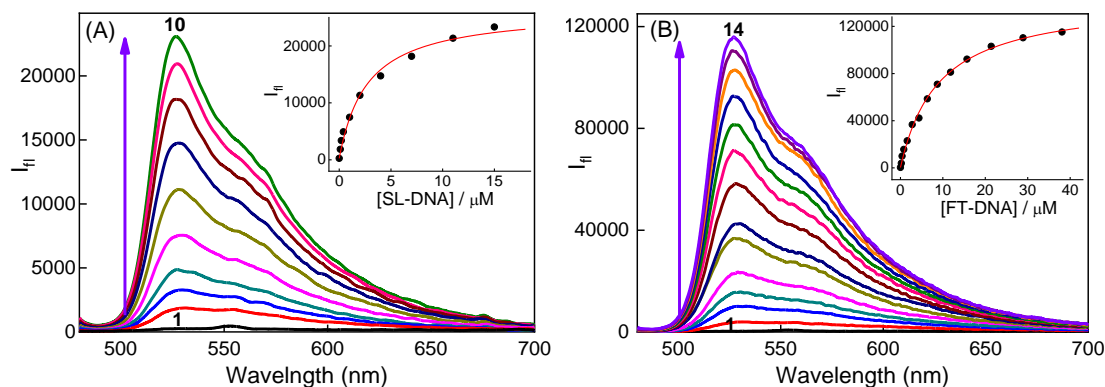

**Fig. S4** Steady-state fluorescence spectra of TO ( $\sim 4 \mu\text{M}$ ) at different concentrations of **(a)** [SL-DNA]/ $\mu\text{M}$ : (1) 0, (2) 0.1, (3) 0.2, (4) 0.4, (5) 1, (6) 2, (7) 4, (8) 7, (9) 11, (10) 15; **(b)** [FT-DNA]/ $\mu\text{M}$ : (1) 0, (2) 0.2, (3) 0.4, (4) 0.8, (5) 2, (6) 3, (7) 4, (8) 6, (9) 9, (10) 12, (11) 16, (12) 21, (13) 29, (14) 38; **Insets** show the binding isotherm of TO with the respective DNA. The above data set is the representative of the individual mouse of Swiss albino strain.

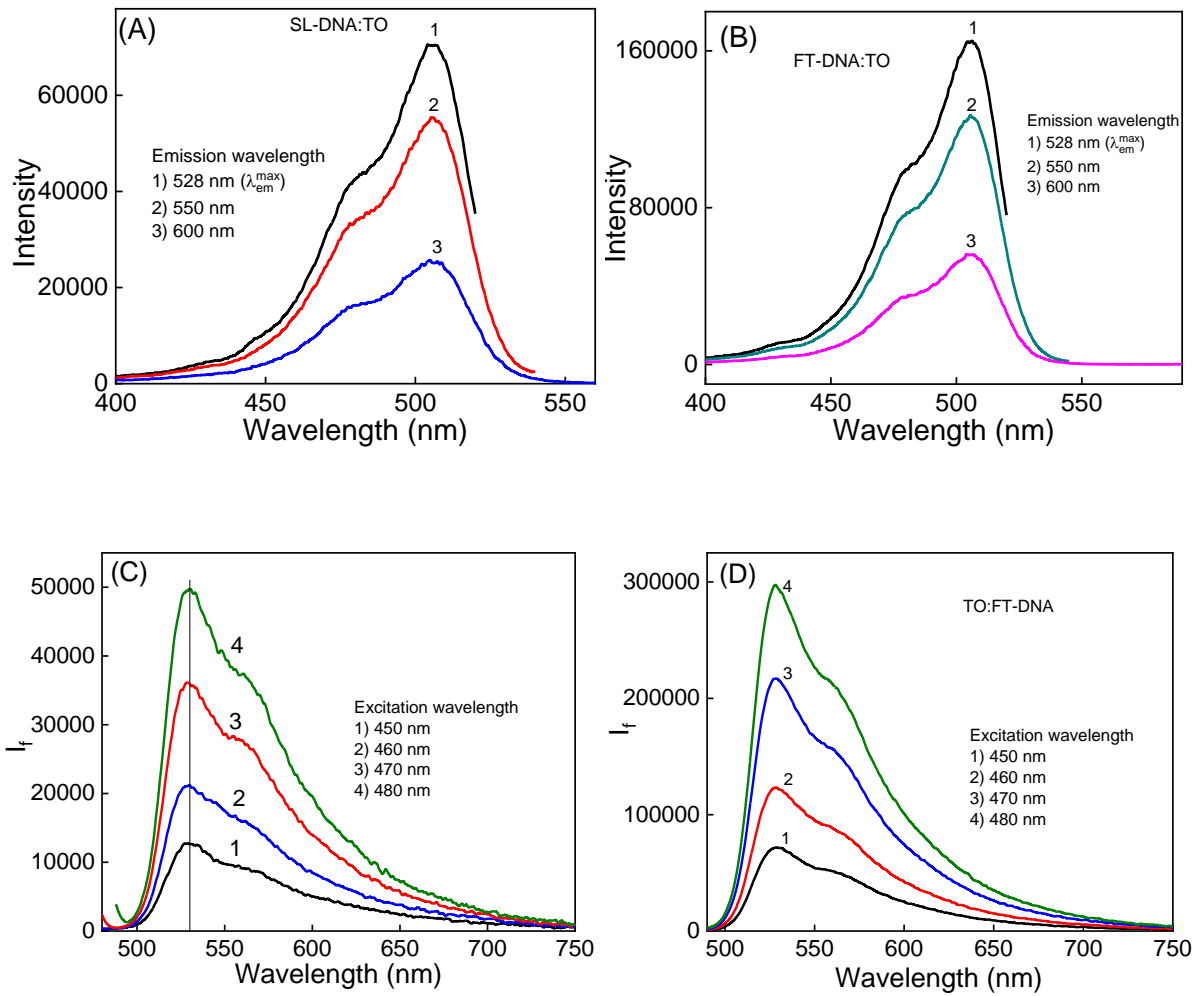

**Fig. S5** Excitation spectra of SL-DNA:TO (A) and FT-DNA:TO (B) recorded by choosing three different emission wavelengths. Emission spectra of SL-DNA:TO (C) and FT-DNA:TO (D) recorded by varying excitation wavelengths

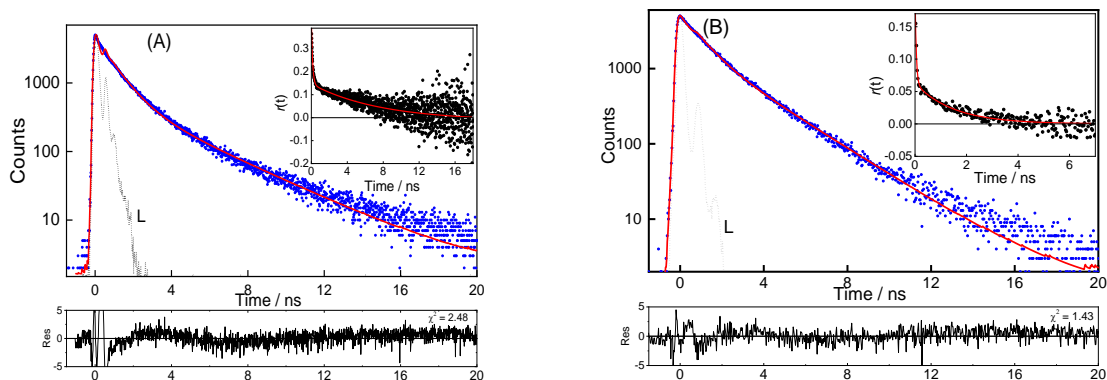

**Fig.S6.** Transient decay trace of TO ( $\lambda_{\text{ex}} = 445\text{nm}$ ,  $\lambda_{\text{em}} = 535\text{nm}$ ) with (A) N-DNA ( $9 \mu\text{M}$ ) and (B) M-DNA ( $29\mu\text{M}$ ). The black dotted line L represents instrument response function (IRF). **Insets:** Time-resolved anisotropy trace recorded for (A) TO-N-DNA; (B) TO-M-DNA systems. The residuals are given for the decay traces in the respective figures.

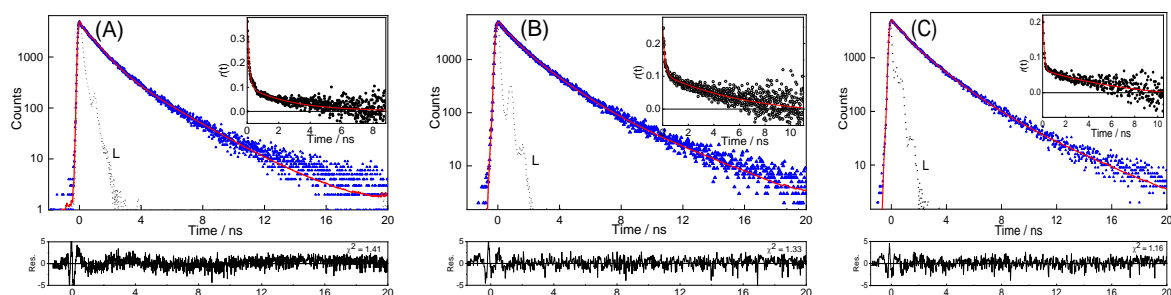

**Fig. S7** Transient decay trace of TO ( $\lambda_{\text{ex}} = 445\text{nm}$ ,  $\lambda_{\text{em}} = 535\text{nm}$ ) with (A) BL-DNA ( $9 \mu\text{M}$ ); (B) WT-DNA ( $29 \mu\text{M}$ ); (C) WL-DNA ( $29 \mu\text{M}$ ). The dotted black line L represents instrument response function (IRF). **Insets:** Time-resolved anisotropy trace recorded for (A) TO-BL-DNA; (B) TO-WT-DNA and (C) TO-WL-DNA systems. The residuals are given for the decay traces in the respective figures.

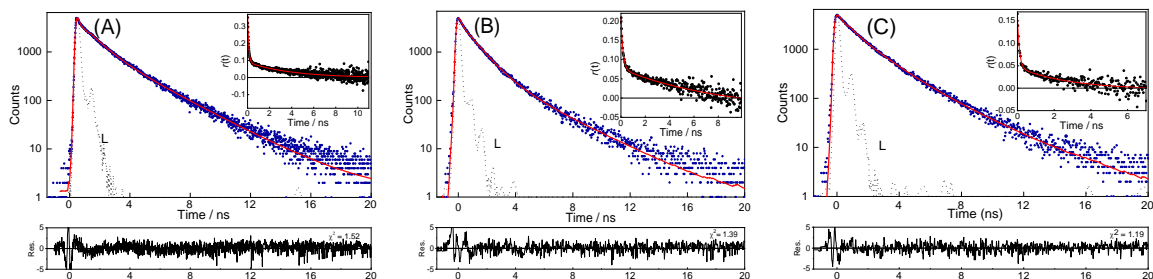

**Fig. S8** Fluorescence lifetime decay trace of TO ( $\lambda_{\text{ex}} = 445\text{nm}$ ,  $\lambda_{\text{em}} = 535\text{nm}$ ) with (A) SL-DNA ( $15 \mu\text{M}$ ); (B) FL-DNA ( $17.5 \mu\text{M}$ ); (C) FT-DNA ( $38 \mu\text{M}$ ). The solid black line (L) represents instrument response function (IRF). **Insets:** Time-resolved anisotropy trace recorded for (A) TO-SL-DNA; (B) TO-FL-DNA and (C) TO-FT-DNA systems. The residuals are given for the decay traces in the respective figures.

**Table S1.** Fluorescence lifetime of TO at different concentrations of normal and tumor DNAs.

| Origin of DNA   | [DNA] / $\mu\text{M}$ | $\tau_1$ (ns)     | $a_1$ | $\tau_2$ (ns) | $a_2$ | $\tau_3$ (ns) | $a_3$ | $\langle\tau\rangle$ (ns) | $\chi^2$ $^{\S}$  |
|-----------------|-----------------------|-------------------|-------|---------------|-------|---------------|-------|---------------------------|-------------------|
| N-DNA (Normal)  | 9.0                   | 0.04 <sup>#</sup> | 0.18  | 0.86          | 0.46  | 3.3           | 0.36  | 1.59                      | 2.48 <sup>§</sup> |
| M-DNA (Tumor)   | 29.0                  | 0.04 <sup>#</sup> | 0.06  | 0.81          | 0.36  | 2.46          | 0.58  | 1.72                      | 1.43              |
| BL-DNA (Normal) | 9.0                   | 0.04 <sup>#</sup> | 0.13  | 0.87          | 0.49  | 2.51          | 0.38  | 1.39                      | 1.41              |
| WT-DNA (Tumor)  | 29.0                  | 0.43              | 0.19  | 1.62          | 0.62  | 3.83          | 0.19  | 1.81                      | 1.33              |
| WL-DNA (Tumor)  | 29.0                  | 1.68              | 0.61  | 1.68          | 0.61  | 3.78          | 0.21  | 1.87                      | 1.16              |
| SL-DNA (Normal) | 15.0                  | 0.04 <sup>#</sup> | 0.13  | 1.0           | 0.42  | 2.53          | 0.45  | 1.56                      | 1.52              |
| FT-DNA (Tumor)  | 38.0                  | 0.42              | 0.19  | 1.55          | 0.57  | 3.19          | 0.25  | 1.76                      | 1.39              |
| FL-DNA (Tumor)  | 17.5                  | 0.35              | 0.15  | 1.46          | 0.62  | 3.48          | 0.23  | 1.76                      | 1.19              |

<sup>#</sup> Considering the limitation of the time resolution, this faster component was fixed the value 40 ps.

<sup>§</sup> The increased  $\chi^2$  value is due to a fluctuation in the prompt profile and also due to a contribution from scattering developed during the DNA titration.

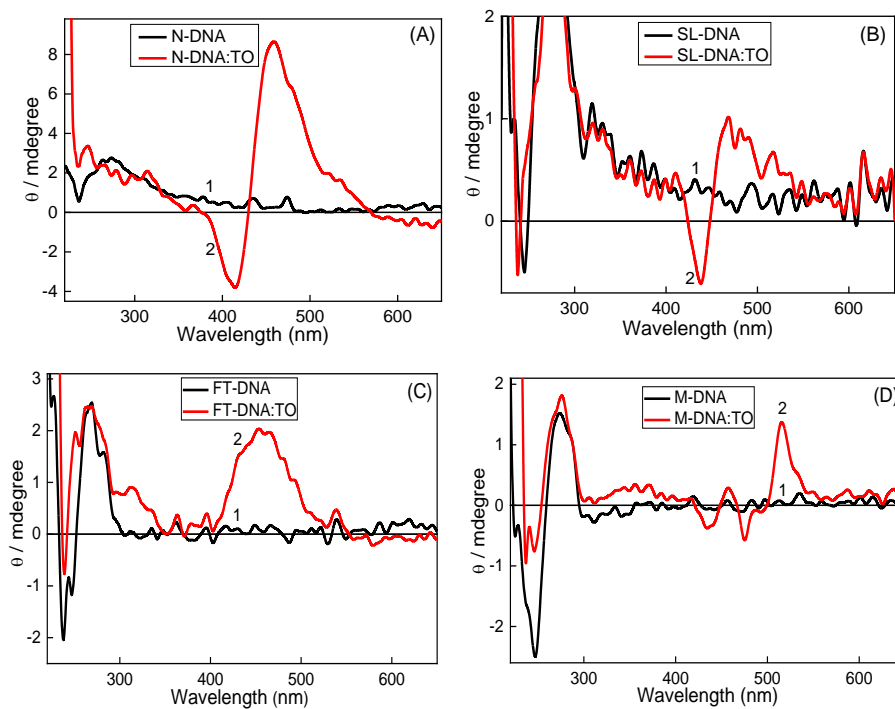

**Fig. S9** Circular Dichroism spectra of **(A)** (1) N-DNA (200  $\mu\text{M}$ ), (2) N-DNA (200  $\mu\text{M}$ ):TO (100  $\mu\text{M}$ ), **(B)** (1) SL-DNA (200  $\mu\text{M}$ ), (2) SL-DNA (200  $\mu\text{M}$ ):TO (100  $\mu\text{M}$ ); **(C)** (1) FT-DNA (200  $\mu\text{M}$ ), (2) FT-DNA (200  $\mu\text{M}$ ):TO (100  $\mu\text{M}$ ), **(D)** (1) M-DNA (200  $\mu\text{M}$ ), (2) M-DNA (200  $\mu\text{M}$ ):TO (100  $\mu\text{M}$ ); The above data set is the representative of the individual mouse of C57BL/6J and Swiss albino strain.

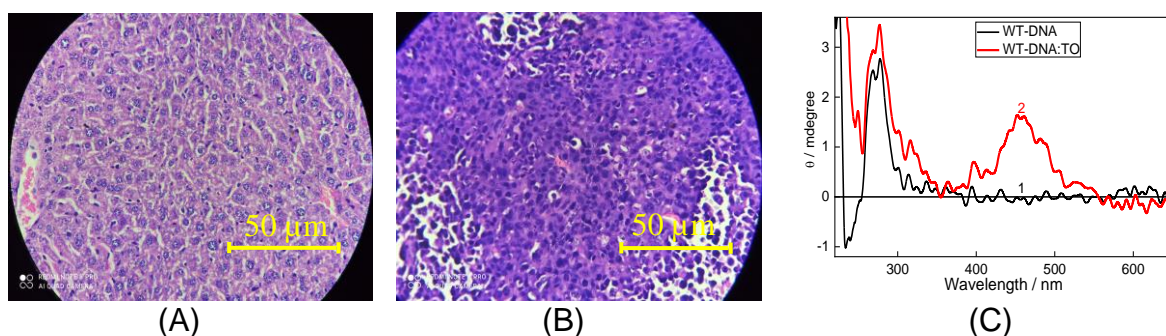

**Fig. S10** Representative images of H&E stained tissue section of non-cancerous liver (A) and fibrosarcoma (B) tissues of BALB/c mice. (C) is the CD spectrum recorded from corresponding cancerous DNA-TO complex.

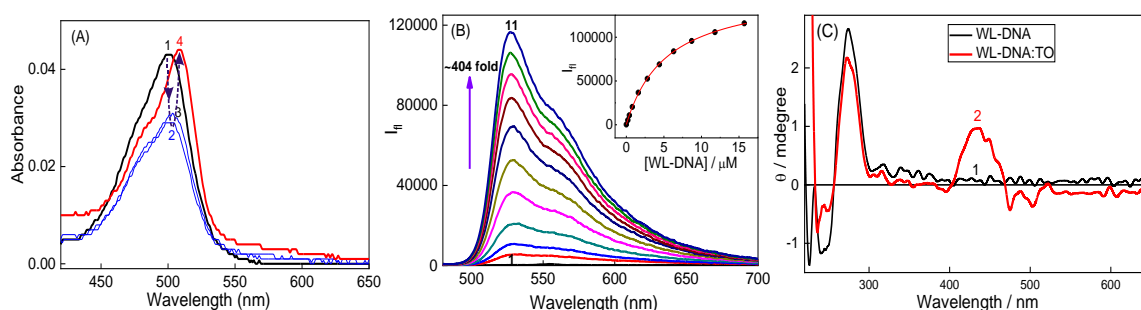

**Fig. S11** (A) Absorption of TO with [WL-DNA]/ $\mu\text{M}$ : (1) 0, (2) 0.4, (3) 0.8 and (4) 16.; (B) Fluorescence of TO with [WL-DNA]/ $\mu\text{M}$ , (1) 0, (2) 0.2, (3) 0.4, (4) 0.8, (5) 2, (6) 3, (7) 4, (8) 6, (9) 9, (10) 12 and (11) 16; (C) CD spectra of TO with (1) WL-DNA (200  $\mu\text{M}$ ), (2) WL-DNA (200  $\mu\text{M}$ ):TO (100  $\mu\text{M}$ ). Inset in (B) shows the binding isotherm of TO with the WL-DNA. The above data set is the representative of the individual mouse of BALB/c strain.

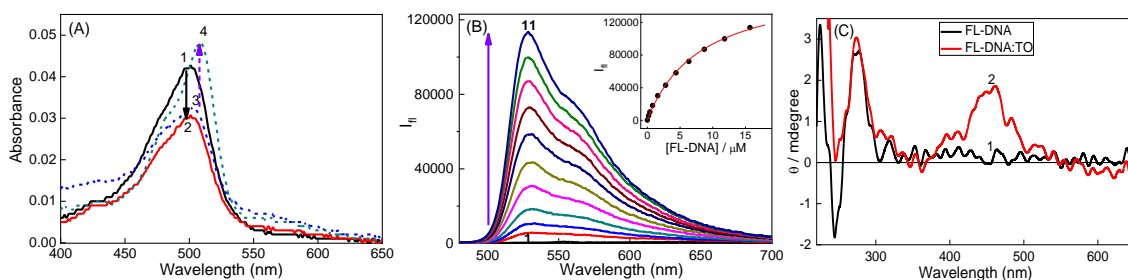

**Fig. S12** (A) Absorption of TO with [FL-DNA]/ $\mu\text{M}$ : (1) 0, (2) 0.2, (3) 0.4, (4) 16.; (B) Fluorescence of TO with [FL-DNA]/ $\mu\text{M}$ , (1) 0, (2) 0.2, (3) 0.4, (4) 0.8, (5) 2, (6) 3, (7) 4, (8) 6, (9) 9, (10) 12, (11) 16; (C) CD spectra of TO with (1) FL-DNA (200  $\mu\text{M}$ ), (2) FL-DNA (200  $\mu\text{M}$ ):TO (100  $\mu\text{M}$ ). Inset in (B) shows the binding isotherm of TO with the FL-DNA. The above data set is the representative of the individual mouse of Swiss albino strain.
